# Supplementary material for: Measurement and mapping of maternal health service coverage through a novel composite index: a sub-national level analysis in India
Source: Springer Nature journal article supplement (doi:10.1186/s12884-022-05080-5), 2022-10-10
Supplement: MOESM1 [file 23587930]

## **Additional file 1**

Additional file 1.pdf

Title: Details of 33<sup>rd</sup> percentile and 66<sup>th</sup> percentiles scores in different scenarios (Scenario I to IV)

|                             | <b>Scenario 1</b> | <b>Scenario II</b> | <b>Scenario III</b> | <b>Scenario IV</b> |
|-----------------------------|-------------------|--------------------|---------------------|--------------------|
| 33 <sup>rd</sup> Percentile | 0.438             | 0.415              | 0.407               | 0.301              |
| 66 <sup>th</sup> percentile | 0.565             | 0.544              | 0.520               | 0.425              |
