# Supplementary material for: Measurement and mapping of maternal health service coverage through a novel composite index: a sub-national level analysis in India
Source: Springer Nature journal article supplement (doi:10.1186/s12884-022-05080-5), 2022-10-10
Supplement: MOESM2 [file 23587930]

## Additional file 2

Additional file 2.pdf

Title: Maternal Health Service Coverage Index (MHSCI) values at sub-national level in India based four different scenarios for base year (2017-2018) and reference year (2019-2020)

| State/UTs                         | Base year: 2017-2018 |             |              |             | Reference year: 2019-2020 |             |              |             |
|-----------------------------------|----------------------|-------------|--------------|-------------|---------------------------|-------------|--------------|-------------|
|                                   | Scenario I           | Scenario II | Scenario III | Scenario IV | Scenario I                | Scenario II | Scenario III | Scenario IV |
| <b>North zone</b>                 |                      |             |              |             |                           |             |              |             |
| Chandigarh                        | 0.370                | 0.244       | 0.244        | 0.183       | 0.470                     | 0.377       | 0.377        | 0.331       |
| Delhi                             | 0.437                | 0.418       | 0.412        | 0.332       | 0.439                     | 0.436       | 0.432        | 0.312       |
| Haryana                           | 0.549                | 0.522       | 0.510        | 0.404       | 0.530                     | 0.505       | 0.500        | 0.398       |
| Himachal Pradesh                  | 0.608                | 0.557       | 0.550        | 0.483       | 0.699                     | 0.646       | 0.645        | 0.575       |
| Jammu & Kashmir                   | 0.505                | 0.478       | 0.451        | 0.342       | 0.499                     | 0.486       | 0.468        | 0.376       |
| Punjab                            | 0.645                | 0.621       | 0.610        | 0.504       | 0.663                     | 0.642       | 0.635        | 0.545       |
| Rajasthan                         | 0.309                | 0.302       | 0.291        | 0.234       | 0.345                     | 0.271       | 0.265        | 0.224       |
| Uttar Pradesh                     | 0.318                | 0.315       | 0.291        | 0.211       | 0.436                     | 0.422       | 0.405        | 0.316       |
| Uttarakhand                       | 0.419                | 0.411       | 0.396        | 0.307       | 0.433                     | 0.425       | 0.408        | 0.311       |
| <b>West zone</b>                  |                      |             |              |             |                           |             |              |             |
| Chhattisgarh                      | 0.597                | 0.589       | 0.560        | 0.504       | 0.572                     | 0.559       | 0.536        | 0.469       |
| Dadra & Nagar Haveli              | 0.556                | 0.520       | 0.518        | 0.412       | 0.663                     | 0.610       | 0.606        | 0.477       |
| Goa                               | 0.564                | 0.544       | 0.542        | 0.430       | 0.660                     | 0.641       | 0.640        | 0.555       |
| Gujarat                           | 0.568                | 0.547       | 0.516        | 0.402       | 0.654                     | 0.641       | 0.618        | 0.490       |
| Madhya Pradesh                    | 0.356                | 0.337       | 0.318        | 0.241       | 0.337                     | 0.274       | 0.262        | 0.207       |
| Maharashtra                       | 0.540                | 0.529       | 0.509        | 0.422       | 0.588                     | 0.572       | 0.561        | 0.477       |
| <b>East &amp; north east zone</b> |                      |             |              |             |                           |             |              |             |
| Andaman & Nicobar Island          | 0.644                | 0.624       | 0.620        | 0.528       | 0.669                     | 0.628       | 0.621        | 0.532       |
| Arunachal Pradesh                 | 0.378                | 0.370       | 0.369        | 0.289       | 0.337                     | 0.321       | 0.320        | 0.252       |
| Assam                             | 0.533                | 0.508       | 0.462        | 0.384       | 0.626                     | 0.594       | 0.561        | 0.478       |
| Bihar                             | 0.334                | 0.328       | 0.297        | 0.201       | 0.369                     | 0.361       | 0.327        | 0.231       |
| Jharkhand                         | 0.410                | 0.407       | 0.374        | 0.277       | 0.467                     | 0.462       | 0.443        | 0.332       |
| Manipur                           | 0.438                | 0.434       | 0.423        | 0.310       | 0.426                     | 0.426       | 0.420        | 0.305       |
| Meghalaya                         | 0.340                | 0.318       | 0.314        | 0.258       | 0.340                     | 0.327       | 0.325        | 0.266       |
| Mizoram                           | 0.481                | 0.454       | 0.446        | 0.321       | 0.346                     | 0.305       | 0.304        | 0.248       |
| Nagaland                          | 0.371                | 0.360       | 0.358        | 0.234       | 0.372                     | 0.370       | 0.368        | 0.247       |
| Odisha                            | 0.591                | 0.557       | 0.533        | 0.456       | 0.692                     | 0.659       | 0.647        | 0.570       |
| Sikkim                            | 0.629                | 0.602       | 0.579        | 0.488       | 0.628                     | 0.614       | 0.605        | 0.492       |
| Tripura                           | 0.479                | 0.451       | 0.446        | 0.263       | 0.504                     | 0.482       | 0.478        | 0.269       |
| West Bengal                       | 0.584                | 0.546       | 0.502        | 0.383       | 0.614                     | 0.583       | 0.565        | 0.394       |
| <b>South zone</b>                 |                      |             |              |             |                           |             |              |             |
| Andhra Pradesh                    | 0.605                | 0.594       | 0.574        | 0.454       | 0.660                     | 0.651       | 0.638        | 0.516       |
| Karnataka                         | 0.712                | 0.678       | 0.672        | 0.567       | 0.723                     | 0.692       | 0.690        | 0.596       |
| Kerala                            | 0.858                | 0.711       | 0.688        | 0.545       | 0.748                     | 0.689       | 0.681        | 0.529       |
| Puducherry                        | 0.546                | 0.532       | 0.523        | 0.466       | 0.388                     | 0.371       | 0.368        | 0.331       |
| Tamil Nadu                        | 0.462                | 0.194       | 0.192        | 0.180       | 0.476                     | 0.202       | 0.201        | 0.189       |
| Telangana                         | 0.540                | 0.530       | 0.499        | 0.392       | 0.472                     | 0.452       | 0.436        | 0.341       |
