# Supplementary material for: Measurement and mapping of maternal health service coverage through a novel composite index: a sub-national level analysis in India
Source: Springer Nature journal article supplement (doi:10.1186/s12884-022-05080-5), 2022-10-10
Supplement: MOESM3 [file 23587930]

### Additional file 3

Additional file 3.pdf

Title: Incremental change of MHSI values and categorization of states in base year and reference year (*Scenario II*)

| State/UTs                         | MHSI Values<br>in Base Year<br>(2017-18) |          | MHSI Values<br>in Reference year<br>(2019-20) |          | Incremental Changes<br>in MHSI |                       |
|-----------------------------------|------------------------------------------|----------|-----------------------------------------------|----------|--------------------------------|-----------------------|
|                                   | Index<br>values                          | Category | Index<br>value                                | Category | Change<br>in value             | Change in<br>category |
| <b>North zone</b>                 |                                          |          |                                               |          |                                |                       |
| Chandigarh*                       | 0.244                                    | Low      | 0.377                                         | Low      | 0.133                          | →                     |
| Delhi*                            | 0.418                                    | Medium   | 0.436                                         | Medium   | 0.019                          | →                     |
| Haryana                           | 0.522                                    | Medium   | 0.505                                         | Medium   | -0.017                         | ←                     |
| Himachal Pradesh                  | 0.557                                    | High     | 0.646                                         | High     | 0.089                          | →                     |
| Jammu & Kashmir                   | 0.478                                    | Medium   | 0.486                                         | Medium   | 0.008                          | →                     |
| Punjab                            | 0.621                                    | High     | 0.642                                         | High     | 0.021                          | →                     |
| Rajasthan                         | 0.302                                    | Low      | 0.271                                         | Low      | -0.031                         | ←                     |
| Uttar Pradesh                     | 0.315                                    | Low      | 0.422                                         | Medium   | 0.107                          | ↑                     |
| Uttarakhand                       | 0.411                                    | Low      | 0.425                                         | Medium   | 0.015                          | ↑                     |
| <b>West zone</b>                  |                                          |          |                                               |          |                                |                       |
| Chhattisgarh                      | 0.589                                    | High     | 0.559                                         | High     | -0.030                         | ←                     |
| Dadra & Nagar Haveli*             | 0.520                                    | Medium   | 0.610                                         | High     | 0.090                          | ↑                     |
| Goa                               | 0.544                                    | Medium   | 0.641                                         | High     | 0.098                          | ↑                     |
| Gujarat                           | 0.547                                    | High     | 0.641                                         | High     | 0.094                          | →                     |
| Madhya Pradesh                    | 0.337                                    | Low      | 0.274                                         | Low      | -0.062                         | ←                     |
| Maharashtra                       | 0.529                                    | Medium   | 0.572                                         | High     | 0.043                          | ↑                     |
| <b>East &amp; north east zone</b> |                                          |          |                                               |          |                                |                       |
| Andaman & Nicobar Island*         | 0.624                                    | High     | 0.628                                         | High     | 0.005                          | →                     |
| Arunachal Pradesh                 | 0.370                                    | Low      | 0.321                                         | Low      | -0.049                         | ←                     |
| Assam                             | 0.508                                    | Medium   | 0.594                                         | High     | 0.085                          | ↑                     |
| Bihar                             | 0.328                                    | Low      | 0.361                                         | Low      | 0.033                          | →                     |
| Jharkhand                         | 0.407                                    | Low      | 0.462                                         | Medium   | 0.054                          | ↑                     |
| Manipur                           | 0.434                                    | Medium   | 0.426                                         | Medium   | -0.008                         | ←                     |
| Meghalaya                         | 0.318                                    | Low      | 0.327                                         | Low      | 0.009                          | →                     |
| Mizoram                           | 0.454                                    | Medium   | 0.305                                         | Low      | -0.149                         | ↓                     |
| Nagaland                          | 0.360                                    | Low      | 0.370                                         | Low      | 0.010                          | →                     |
| Odisha                            | 0.557                                    | High     | 0.659                                         | High     | 0.102                          | →                     |
| Sikkim                            | 0.602                                    | High     | 0.614                                         | High     | 0.011                          | →                     |
| Tripura                           | 0.451                                    | Medium   | 0.482                                         | Medium   | 0.031                          | →                     |
| West Bengal                       | 0.546                                    | High     | 0.583                                         | High     | 0.038                          | →                     |
| <b>South zone</b>                 |                                          |          |                                               |          |                                |                       |
| Andhra Pradesh                    | 0.594                                    | High     | 0.651                                         | High     | 0.057                          | →                     |
| Karnataka                         | 0.678                                    | High     | 0.692                                         | High     | 0.014                          | →                     |
| Kerala                            | 0.711                                    | High     | 0.689                                         | High     | -0.021                         | ←                     |
| Puducherry*                       | 0.532                                    | Medium   | 0.371                                         | Low      | -0.161                         | ↓                     |
| Tamil Nadu                        | 0.194                                    | Low      | 0.202                                         | Low      | 0.008                          | →                     |

|           |       |        |       |        |        |   |
|-----------|-------|--------|-------|--------|--------|---|
| Telangana | 0.530 | Medium | 0.452 | Medium | -0.078 | ← |
|-----------|-------|--------|-------|--------|--------|---|

↑ Upward transition from a lower category to higher; → No change in category but MHSI value increased; → No change in category but MHSI value decreased; ↓ Downward transition from a higher category to lower.

\*Denotes Union Territory (UT).
