# Supplementary material for: Measurement and mapping of maternal health service coverage through a novel composite index: a sub-national level analysis in India
Source: Springer Nature journal article supplement (doi:10.1186/s12884-022-05080-5), 2022-10-10
Supplement: MOESM4 [file 23587930]

## Additional file 4

Additional file 4.pdf

Title: Incremental change of MHSI values and categorization of states in base year and reference year (*Scenario III*)

| State/UTs                         | MHSI Values<br>in Base Year<br>(2017-18) |          | MHSI Values<br>in Reference year<br>(2019-20) |          | Incremental Changes<br>in MHSI |                       |
|-----------------------------------|------------------------------------------|----------|-----------------------------------------------|----------|--------------------------------|-----------------------|
|                                   | Index<br>value                           | Category | Index<br>value                                | Category | Change<br>in value             | Change in<br>category |
| <b>North zone</b>                 |                                          |          |                                               |          |                                |                       |
| Chandigarh*                       | 0.451                                    | Medium   | 0.377                                         | Low      | -0.075                         | ↓                     |
| Delhi*                            | 0.374                                    | Low      | 0.432                                         | Medium   | 0.059                          | ↑                     |
| Haryana                           | 0.672                                    | High     | 0.500                                         | Medium   | -0.172                         | ↓                     |
| Himachal Pradesh                  | 0.688                                    | High     | 0.645                                         | High     | -0.042                         | ←                     |
| Jammu& Kashmir                    | 0.318                                    | Low      | 0.468                                         | Medium   | 0.151                          | ↑                     |
| Punjab                            | 0.509                                    | Medium   | 0.635                                         | High     | 0.127                          | ↑                     |
| Rajasthan                         | 0.423                                    | Medium   | 0.265                                         | Low      | -0.158                         | ↓                     |
| Uttar Pradesh                     | 0.314                                    | Low      | 0.405                                         | Low      | 0.091                          | →                     |
| Uttarakhand                       | 0.446                                    | Medium   | 0.408                                         | Medium   | -0.037                         | ←                     |
| <b>West zone</b>                  |                                          |          |                                               |          |                                |                       |
| Chhattisgarh                      | 0.192                                    | Low      | 0.536                                         | High     | 0.344                          | ↑                     |
| Dadra & Nagar Haveli*             | 0.499                                    | Medium   | 0.606                                         | High     | 0.107                          | ↑                     |
| Goa                               | 0.446                                    | Medium   | 0.640                                         | High     | 0.194                          | ↑                     |
| Gujarat                           | 0.291                                    | Low      | 0.618                                         | High     | 0.328                          | ↑                     |
| Madhya Pradesh                    | 0.396                                    | Low      | 0.262                                         | Low      | -0.134                         | ←                     |
| Maharashtra                       | 0.502                                    | Medium   | 0.561                                         | High     | 0.059                          | ↑                     |
| <b>East &amp; north east zone</b> |                                          |          |                                               |          |                                |                       |
| Andaman & Nicobar Island*         | 0.620                                    | High     | 0.621                                         | High     | 0.001                          | →                     |
| Arunachal Pradesh                 | 0.574                                    | High     | 0.320                                         | Low      | -0.254                         | ↓                     |
| Assam                             | 0.369                                    | Low      | 0.561                                         | High     | 0.192                          | ↑                     |
| Bihar                             | 0.462                                    | Medium   | 0.327                                         | Low      | -0.135                         | ↓                     |
| Jharkhand                         | 0.297                                    | Low      | 0.443                                         | Medium   | 0.146                          | ↑                     |
| Manipur                           | 0.244                                    | Low      | 0.420                                         | Medium   | 0.176                          | ↑                     |
| Meghalaya                         | 0.560                                    | High     | 0.325                                         | Low      | -0.236                         | ↓                     |
| Mizoram                           | 0.518                                    | Medium   | 0.304                                         | Low      | -0.215                         | ↓                     |
| Nagaland                          | 0.412                                    | Medium   | 0.368                                         | Low      | -0.045                         | ↓                     |
| Odisha                            | 0.542                                    | High     | 0.647                                         | High     | 0.104                          | →                     |
| Sikkim                            | 0.516                                    | Medium   | 0.605                                         | High     | 0.089                          | ↑                     |
| Tripura                           | 0.510                                    | Medium   | 0.478                                         | Medium   | -0.031                         | ←                     |
| West Bengal                       | 0.550                                    | High     | 0.565                                         | High     | 0.014                          | →                     |
| <b>South zone</b>                 |                                          |          |                                               |          |                                |                       |
| Andhra Pradesh                    | 0.358                                    | Low      | 0.638                                         | High     | 0.280                          | ↑                     |
| Karnataka                         | 0.533                                    | High     | 0.690                                         | High     | 0.157                          | →                     |
| Kerala                            | 0.523                                    | High     | 0.681                                         | High     | 0.157                          | →                     |
| Puducherry*                       | 0.610                                    | High     | 0.368                                         | Low      | -0.243                         | ↓                     |
| Tamil Nadu                        | 0.291                                    | Low      | 0.201                                         | Low      | -0.090                         | ←                     |

|           |       |      |       |        |        |   |
|-----------|-------|------|-------|--------|--------|---|
| Telangana | 0.579 | High | 0.436 | Medium | -0.142 | ↓ |
|-----------|-------|------|-------|--------|--------|---|

↑ Upward transition from a lower category to higher; → No change in category but MHSI value increased; → No change in category but MHSI value decreased; ↓ Downward transition from a higher category to lower.

\*Denotes Union Territory (UT).
